# Supplementary material
Source: PubMed Central journal article supplement (PMC3458343)
Supplement: 1205508109_sfig03.pdf [file 1205508109_sfig03.pdf]

Fig.S3A

p110α peptides

|     |     |   |      |       | p110α wild-type |     |              | p110α G106V |     |                  | p110α N345K |     |       |    |     |              |    |     |                  |    |     |    |    |     |    |    |    |    |    |    |    |    |
|-----|-----|---|------|-------|-----------------|-----|--------------|-------------|-----|------------------|-------------|-----|-------|----|-----|--------------|----|-----|------------------|----|-----|----|----|-----|----|----|----|----|----|----|----|----|
| S   | E   | Z | RT   | basal |                 |     | +PDGFR<br>pY |             |     | +pY<br>and lipid |             |     | basal |    |     | +PDGFR<br>pY |    |     | +pY<br>and lipid |    |     |    |    |     |    |    |    |    |    |    |    |    |
|     |     |   |      | 3     | 30              | 300 | 3            | 30          | 300 | 3                | 30          | 300 | 3     | 30 | 300 | 3            | 30 | 300 | 3                | 30 | 300 | 3  | 30 | 300 |    |    |    |    |    |    |    |    |
| 11  | 23  | 3 | 14.4 | 14.6  | 19              | 31  | 42           | 18          | 31  | 41               | 20          | 33  | 41    | 20 | 32  | 42           | 24 | 34  | 43               | 25 | 36  | 43 | 23 | 35  | 44 | 24 | 34 | 43 | 24 | 36 | 42 |    |
| 37  | 42  | 2 | 8.9  | 9.4   | 1               | 1   | 2            | 1           | 1   | 3                | 0           | 1   | 5     | 1  | 1   | 3            | 1  | 1   | 2                | 0  | 0   | 7  | 1  | 1   | 2  | 1  | 1  | 3  | 0  | 1  | 6  |    |
| 43  | 68  | 3 | 11.6 | 12.2  | 5               | 15  | 25           | 5           | 15  | 24               | 5           | 15  | 24    | 6  | 14  | 24           | 6  | 16  | 25               | 5  | 15  | 25 | 6  | 16  | 25 | 7  | 16 | 24 | 5  | 15 | 25 |    |
| 71  | 76  | 1 | 6.8  | 7.1   | 0               | 4   | 18           | 0           | 5   | 18               | 1           | 13  | 18    | 0  | 5   | 18           | 1  | 13  | 20               | 2  | 16  | 20 | 0  | 8   | 19 | 2  | 16 | 20 | 2  | 16 | 20 |    |
| 71  | 82  | 2 | 11.1 | 11.6  | 3               | 14  | 22           | 3           | 14  | 23               | 4           | 16  | 23    | 5  | 15  | 22           | 6  | 19  | 24               | 6  | 17  | 24 | 4  | 15  | 24 | 6  | 18 | 25 | 5  | 17 | 23 |    |
| 83  | 92  | 2 | 11.9 | 12.3  | 0               | 1   | 3            | 1           | 1   | 3                | 1           | 1   | 5     | 0  | 1   | 4            | 1  | 1   | 6                | 0  | 1   | 6  | 1  | 1   | 4  | 1  | 1  | 6  | 1  | 1  | 6  |    |
| 92  | 99  | 2 | 16.2 | 16.6  | 0               | 0   | 1            | 1           | 0   | 1                | 1           | 1   | 3     | 0  | 1   | 2            | 1  | 0   | 3                | 0  | 1   | 5  | 1  | 1   | 2  | 1  | 0  | 3  | 1  | 1  | 4  |    |
| 92  | 113 | 5 | 14.2 | 14.7  | 13              | 19  | 28           | 13          | 20  | 31               | 16          | 28  | 32    | ## | ##  | ##           | ## | ##  | ##               | ## | ##  | ## | ## | ##  | ## | ## | ## | ## | ## | ## | ## |    |
| 92  | 119 | 4 | 14.8 | 15.1  | 12              | 18  | 29           | 12          | 20  | 33               | 16          | 33  | 40    | 24 | 38  | 45           | 30 | 44  | 48               | 33 | 46  | 51 | 14 | 21  | 31 | 20 | 29 | 32 | 22 | 31 | 32 |    |
| 93  | 99  | 2 | 15.3 | 15.9  | 2               | 1   | 2            | 2           | 1   | 1                | 1           | 1   | 1     | 1  | 0   | 2            | 1  | 1   | 1                | 1  | 1   | 1  | 1  | 1   | 1  | 1  | 1  | 1  | 1  | 1  | 1  |    |
| 93  | 119 | 5 | 13.6 | 14.4  | 12              | 18  | 30           | 12          | 21  | 34               | 17          | 34  | 41    | ## | ##  | ##           | ## | ##  | ##               | ## | ##  | ## | ## | ##  | ## | ## | ## | ## | ## | ## | ## |    |
| 100 | 109 | 2 | 6.5  | 6.6   | 39              | 51  | 56           | 37          | 49  | 55               | 38          | 53  | 48    | ## | ##  | ##           | ## | ##  | ##               | ## | ##  | ## | ## | ##  | ## | ## | ## | ## | ## | ## | ## |    |
| 100 | 119 | 4 | 11.5 | 11.9  | 11              | 19  | 34           | 12          | 23  | 40               | 18          | 41  | 50    | 31 | 49  | 60           | 40 | 58  | 65               | 44 | 61  | 67 | 13 | 22  | 41 | 23 | 42 | 48 | 31 | 44 | 52 |    |
| 120 | 127 | 1 | 11.8 | 12.1  | 5               | 17  | 27           | 7           | 19  | 32               | 10          | 29  | 48    | 6  | 19  | 31           | 16 | 29  | 50               | 17 | 37  | 53 | 13 | 25  | 37 | 16 | 30 | 48 | 16 | 36 | 53 |    |
| 120 | 128 | 1 | 15.3 | 15.7  | 4               | 17  | 30           | 6           | 19  | 34               | 8           | 27  | 47    | 5  | 20  | 33           | 12 | 29  | 49               | 13 | 34  | 51 | 10 | 26  | 38 | 12 | 31 | 46 | 13 | 33 | 50 |    |
| 129 | 139 | 2 | 10.3 | 11.1  | 13              | 23  | 33           | 12          | 23  | 34               | 11          | 21  | 32    | 14 | 24  | 33           | 13 | 24  | 34               | 12 | 24  | 33 | 15 | 27  | 34 | 13 | 25 | 31 | 12 | 24 | 31 |    |
| 129 | 146 | 4 | 13.1 | 13.3  | 9               | 18  | 25           | 9           | 19  | 25               | 8           | 18  | 24    | 9  | 19  | 24           | 8  | 19  | 24               | 8  | 18  | 24 | 9  | 21  | 25 | 10 | 20 | 24 | 8  | 19 | 24 |    |
| 140 | 146 | 2 | 9.9  | 10.1  | 12              | 28  | 31           | 11          | 28  | 32               | 10          | 26  | 30    | 13 | 28  | 33           | 13 | 29  | 33               | 9  | 27  | 32 | 13 | 29  | 33 | 12 | 28 | 32 | 9  | 27 | 31 |    |
| 145 | 152 | 2 | 6.7  | 7.0   | 2               | 2   | 4            | 2           | 2   | 5                | 1           | 2   | 4     | 2  | 2   | 4            | 1  | 2   | 5                | 1  | 2   | 4  | 1  | 2   | 5  | 1  | 2  | 5  | 1  | 3  | 6  |    |
| 145 | 164 | 4 | 10.0 | 10.2  | 9               | 11  | 20           | 8           | 11  | 21               | 8           | 10  | 19    | 9  | 10  | 20           | 9  | 11  | 21               | 8  | 10  | 20 | 9  | 11  | 21 | 8  | 11 | 20 | 8  | 11 | 19 |    |
| 154 | 164 | 3 | 5.6  | 6.0   | 14              | 17  | 27           | 13          | 16  | 29               | 12          | 16  | 26    | 14 | 16  | 27           | 14 | 17  | 29               | 15 | 18  | 26 | 15 | 18  | 30 | 13 | 18 | 28 | 11 | 17 | 25 |    |
| 165 | 192 | 3 | 12.0 | 12.3  | 22              | 28  | 39           | 21          | 28  | 38               | 20          | 27  | 33    | 23 | 27  | 37           | 23 | 29  | 38               | 22 | 29  | 34 | 23 | 29  | 38 | 23 | 29 | 37 | 21 | 28 | 34 |    |
| 165 | 193 | 4 | 12.1 | 12.6  | 20              | 25  | 36           | 20          | 26  | 35               | 19          | 25  | 32    | 21 | 26  | 35           | 21 | 27  | 36               | 20 | 27  | 32 | 22 | 27  | 36 | 21 | 28 | 35 | 19 | 26 | 33 |    |
| 193 | 209 | 3 | 13.8 | 14.1  | 20              | 31  | 37           | 19          | 31  | 36               | 17          | 29  | 32    | 19 | 31  | 35           | 20 | 32  | 37               | 18 | 31  | 34 | 21 | 32  | 37 | 20 | 32 | 36 | 17 | 30 | 34 |    |
| 223 | 233 | 2 | 6.4  | 6.7   | 33              | 37  | 44           | 32          | 39  | 43               | 32          | 38  | 39    | 37 | 37  | 40           | 36 | 40  | 42               | 33 | 39  | 41 | 37 | 40  | 45 | 35 | 41 | 44 | 30 | 36 | 41 |    |
| 224 | 233 | 3 | 5.5  | 6.2   | 32              | 36  | 38           | 31          | 37  | 39               | 31          | 34  | 35    | 34 | 34  | 37           | 33 | 38  | 38               | 30 | 37  | 36 | 35 | 38  | 40 | 32 | 38 | 38 | 29 | 33 | 35 |    |
| 234 | 241 | 2 | 11.3 | 11.6  | 70              | 69  | 70           | 69          | 68  | 71               | 67          | 70  | 68    | 70 | 70  | 69           | 70 | 71  | 69               | 70 | 75  | 70 | 70 | 72  | 71 | 70 | 69 | 70 | 67 | 68 | 71 | 68 |
| 244 | 252 | 2 | 12.7 | 13.1  | 47              | 51  | 51           | 46          | 53  | 53               | 44          | 52  | 50    | 47 | 51  | 50           | 47 | 53  | 53               | 45 | 55  | 51 | 49 | 52  | 53 | 47 | 53 | 52 | 44 | 53 | 50 |    |
| 253 | 259 | 1 | 6.3  | 6.8   | 3               | 7   | 9            | 3           | 7   | 10               | 2           | 7   | 9     | 2  | 7   | 9            | 3  | 8   | 9                | 2  | 9   | 9  | 3  | 9   | 11 | 3  | 8  | 10 | 2  | 8  | 8  |    |
| 260 | 275 | 4 | 12.0 | 12.4  | 12              | 13  | 18           | 12          | 14  | 18               | 12          | 13  | 16    | 12 | 13  | 17           | 13 | 14  | 18               | 12 | 14  | 17 | 13 | 14  | 18 | 13 | 14 | 18 | 12 | 14 | 17 |    |
| 262 | 275 | 3 | 10.3 | 10.8  | 10              | 10  | 11           | 10          | 11  | 11               | 10          | 10  | 11    | 11 | 10  | 11           | 11 | 11  | 11               | 10 | 11  | 11 | 11 | 11  | 11 | 11 | 11 | 10 | 11 | 10 | 11 | 10 |
| 270 | 275 | 2 | 7.2  | 7.7   | 19              | 20  | 20           | 19          | 20  | 21               | 18          | 20  | 18    | 20 | 20  | 20           | 19 | 20  | 21               | 19 | 20  | 20 | 21 | 21  | 22 | 19 | 20 | 20 | 19 | 19 | 19 |    |
| 279 | 285 | 2 | 11.3 | 11.8  | 22              | 30  | 37           | 22          | 29  | 38               | 20          | 27  | 35    | 22 | 29  | 38           | 22 | 30  | 39               | 20 | 28  | 36 | 23 | 30  | 39 | 22 | 30 | 38 | 21 | 28 | 35 |    |
| 279 | 287 | 2 | 14.2 | 14.5  | 13              | 17  | 20           | 12          | 17  | 22               | 12          | 15  | 21    | 13 | 16  | 21           | 13 | 17  | 22               | 12 | 16  | 20 | 14 | 17  | 22 | 13 | 17 | 21 | 12 | 16 | 19 |    |
| 294 | 301 | 1 | 12.4 | 12.5  | 38              | 51  | 57           | 35          | 51  | 58               | 35          | 50  | 55    | 39 | 51  | 57           | 38 | 52  | 60               | 36 | 53  | 55 | 40 | 53  | 59 | 37 | 52 | 57 | 36 | 53 | 55 |    |
| 302 | 327 | 4 | 11.2 | 11.8  | 39              | 39  | 44           | 39          | 41  | 45               | 39          | 40  | 45    | 40 | 39  | 43           | 41 | 41  | 46               | 42 | 44  | 46 | 41 | 40  | 43 | 40 | 42 | 42 | 40 | 43 | 43 |    |
| 308 | 327 | 3 | 9.2  | 9.5   | 46              | 46  | 50           | 45          | 49  | 54               | 45          | 49  | 52    | 47 | 47  | 50           | 47 | 50  | 54               | 48 | 48  | 52 | 48 | 48  | 52 | 46 | 49 | 51 | 45 | 51 | 52 |    |
| 321 | 327 | 2 | 6.6  | 6.8   | 24              | 42  | 50           | 22          | 41  | 52               | 21          | 43  | 46    | 26 | 44  | 49           | 25 | 46  | 55               | 23 | 44  | 54 | 28 | 47  | 54 | 24 | 45 | 52 | 22 | 41 | 52 |    |
| 328 | 334 | 2 | 14.4 | 14.9  | 27              | 30  | 32           | 27          | 31  | 35               | 26          | 30  | 31    | 27 | 30  | 32           | 28 | 32  | 37               | 28 | 34  | 31 | 28 | 32  | 32 | 27 | 33 | 31 | 25 | 32 | 31 |    |
| 335 | 340 | 2 | 10.0 | 10.2  | 0               | 0   | 1            | 0           | 0   | 1                | 0           | 0   | 3     | 0  | 0   | 1            | 0  | 0   | 0                | 0  | 0   | 0  | 0  | 1   | 2  | 0  | 1  | 1  | 0  | 0  | 0  |    |
| 335 | 341 | 2 | 10.3 | 10.6  | 0               | 1   | 2            | 0           | 1   | 2                | 0           | 1   | 1     | 0  | 1   | 3            | 0  | 0   | 2                | 0  | 1   | 1  | 7  | 15  | 18 | 0  | 1  | 5  | 0  | 1  | 3  |    |
| 335 | 342 | 2 | 9.5  | 10.0  | 1               | 6   | 17           | 1           | 5   | 17               | 1           | 3   | 14    | 1  | 6   | 17           | 1  | 4   | 17               | 1  | 2   | 13 | 9  | 26  | 33 | 2  | 10 | 28 | 1  | 3  | 16 |    |
| 343 | 350 | 2 | 9.5  | 9.7   | 68              | 83  | 82           | 77          | 80  | 83               | 75          | 80  | 78    | 66 | 82  | 81           | 83 | 84  | 83               | 79 | 82  | 80 | ## | ##  | ## | ## | ## | ## | ## | ## | ## | ## |
| 343 | 354 | 3 | 12.2 | 12.4  | 46              | 54  | 62           | 48          | 56  | 63               | 47          | 57  | 59    | 44 | 54  | 59           | 54 | 60  | 63               | 48 | 60  | 59 | 50 | 53  | 53 | 48 | 52 | 50 | 42 | 50 | 49 |    |
| 343 | 369 | 3 | 12.9 | 13.3  | 18              | 21  | 25           | 18          | 21  | 25               | 17          | 21  | 24    | 17 | 20  | 24           | 21 | 23  | 25               | 19 | 23  | 24 | ## | ##  | ## | ## | ## | ## | ## | ## | ## | ## |
| 356 | 369 | 2 | 9.7  | 9.9   | 3               | 4   | 5            | 3           | 5   | 6                | 3           | 5   | 5     | 3  | 4   | 5            | 4  | 5   | 6                | 3  | 6   | 5  | 4  | 5   | 6  | 3  | 5  | 5  | 3  | 6  | 5  |    |
| 370 | 386 | 2 | 12.5 | 13.1  | 13              | 27  | 38           | 12          | 27  | 39               | 11          | 25  | 35    | 13 | 27  | 37           | 14 | 27  | 40               | 11 | 27  | 35 | 16 | 28  | 39 | 15 | 27 | 37 | 11 | 26 | 34 |    |
| 370 | 389 | 2 | 14.0 | 14.4  | 9               | 22  | 34           | 9           | 21  | 34               | 8           | 20  | 32    | 9  | 21  | 33           | 10 | 22  | 34               | 8  | 22  | 31 | 11 | 22  | 34 | 11 | 22 | 32 | 8  | 20 | 30 |    |
| 390 | 402 | 2 | 13.3 | 13.7  | 1               | 5   | 10           | 1           | 2   | 9                | 1           | 2   | 8     | 1  | 4   | 10           | 1  | 2   | 9                | 1  | 2   | 7  | 1  | 5   | 11 | 1  | 2  | 8  | 1  | 2  | 7  |    |
| 391 | 402 | 3 | 12.6 | 13.0  | 1               | 1   | 1            | 1           | 1   | 1                | 1           | 1   | 1     | 1  | 1   | 1            | 1  | 1   | 1                | 1  | 1   | 1  | 1  | 1   | 1  | 1  | 1  | 1  | 1  | 1  | 1  |    |
| 405 | 429 | 3 | 12.2 | 12.8  | 3               | 3   | 6            | 3           | 4   | 6                | 3           | 3   | 6     | 3  | 3   | 6            | 4  | 4   | 7                | 4  | 5   | 6  | 4  | 4   | 7  | 3  | 5  | 6  | 3  | 4  | 6  |    |
| 430 | 443 | 2 | 14.1 | 14.5  | 11              | 18  | 25           | 10          | 18  | 26               | 9           | 17  | 25    | 11 | 17  | 25           | 11 | 18  | 26               | 9  | 17  | 24 | 11 | 18  | 26 | 11 | 18 | 26 | 9  | 18 | 25 |    |
| 437 | 443 | 2 | 9.5  | 9.8   | 24              | 41  | 43           | 24          | 39  | 43               | 21          | 39  | 42    | 24 | 38  | 43           | 24 | 40  | 43               | 21 | 40  | 42 | 24 | 40  | 43 | 23 | 41 | 42 | 20 |    |    |    |

Fig.S3A  
p110α peptides

p110α wild-type

p110α G106V

p110α N345K

| S    | E    | Z | RT   | p110α wild-type |    |     |           |    |     |               |    |     | p110α G106V |    |     |           |    |     |               |    |     | p110α N345K |    |     |           |    |     |               |    |     |    |    |
|------|------|---|------|-----------------|----|-----|-----------|----|-----|---------------|----|-----|-------------|----|-----|-----------|----|-----|---------------|----|-----|-------------|----|-----|-----------|----|-----|---------------|----|-----|----|----|
|      |      |   |      | basal           |    |     | +PDGFR pY |    |     | +pY and lipid |    |     | basal       |    |     | +PDGFR pY |    |     | +pY and lipid |    |     | basal       |    |     | +PDGFR pY |    |     | +pY and lipid |    |     |    |    |
|      |      |   |      | 3               | 30 | 300 | 3         | 30 | 300 | 3             | 30 | 300 | 3           | 30 | 300 | 3         | 30 | 300 | 3             | 30 | 300 | 3           | 30 | 300 | 3         | 30 | 300 | 3             | 30 | 300 | 3  | 30 |
| 602  | 618  | 3 | 13.6 | 13.9            | 1  | 4   | 8         | 1  | 4   | 8             | 1  | 4   | 8           | 1  | 5   | 8         | 1  | 4   | 9             | 1  | 5   | 8           | 1  | 4   | 9         | 1  | 4   | 8             | 1  | 4   | 8  |    |
| 602  | 632  | 5 | 16.7 | 17.0            | 5  | 10  | 20        | 5  | 9   | 20            | 5  | 9   | 19          | 5  | 9   | 19        | 5  | 10  | 20            | 6  | 10  | 20          | 6  | 10  | 20        | 5  | 10  | 20            | 5  | 9   | 19 |    |
| 635  | 648  | 2 | 16.0 | 16.6            | 3  | 10  | 15        | 3  | 11  | 16            | 2  | 10  | 16          | 3  | 11  | 17        | 3  | 11  | 17            | 3  | 11  | 17          | 3  | 11  | 17        | 3  | 12  | 17            | 3  | 11  | 17 |    |
| 649  | 666  | 4 | 11.2 | 11.7            | 0  | 0   | 0         | 0  | 0   | 1             | 0  | 0   | 1           | 0  | 0   | 0         | 0  | 0   | 1             | 0  | 0   | 1           | 0  | 0   | 1         | 0  | 0   | 1             | 0  | 0   | 1  |    |
| 667  | 671  | 2 | 16.0 | 16.4            | 1  | 2   | 2         | 2  | 2   | 2             | 1  | 2   | 1           | 2  | 2   | 1         | 1  | 1   | 1             | 2  | 1   | 2           | 2  | 2   | 1         | 1  | 1   | 1             | 1  | 1   | 1  |    |
| 667  | 687  | 5 | 12.9 | 13.4            | 3  | 4   | 10        | 3  | 5   | 11            | 3  | 5   | 11          | 3  | 5   | 10        | 3  | 5   | 13            | 3  | 6   | 12          | 4  | 5   | 11        | 4  | 6   | 13            | 3  | 5   | 11 |    |
| 676  | 687  | 2 | 11.5 | 11.7            | 4  | 7   | 16        | 4  | 8   | 19            | 4  | 8   | 17          | 5  | 7   | 17        | 5  | 9   | 22            | 5  | 10  | 19          | 5  | 9   | 20        | 5  | 10  | 22            | 5  | 9   | 20 |    |
| 691  | 697  | 1 | 8.8  | 9.0             | 29 | 29  | 29        | 28 | 29  | 30            | 28 | 28  | 30          | 30 | 29  | 30        | 30 | 29  | 30            | 28 | 28  | 30          | 31 | 30  | 31        | 28 | 29  | 30            | 28 | 29  | 27 |    |
| 698  | 708  | 2 | 6.9  | 7.2             | 0  | 1   | 1         | 0  | 1   | 2             | 0  | 1   | 2           | 0  | 1   | 2         | 0  | 1   | 2             | 0  | 1   | 2           | 0  | 1   | 2         | 0  | 1   | 1             | 0  | 2   | 1  |    |
| 698  | 709  | 2 | 8.3  | 8.7             | 0  | 1   | 1         | 0  | 1   | 1             | 0  | 1   | 1           | 0  | 1   | 1         | 0  | 1   | 1             | 0  | 1   | 1           | 0  | 1   | 1         | 0  | 1   | 1             | 1  | 1   | 1  |    |
| 698  | 734  | 4 | 12.9 | 13.3            | 21 | 24  | 28        | 21 | 24  | 27            | 18 | 22  | 26          | 22 | 24  | 27        | 23 | 26  | 29            | 15 | 22  | 25          | 23 | 25  | 28        | 23 | 26  | 29            | 15 | 21  | 25 |    |
| 716  | 734  | 3 | 9.7  | 9.8             | 43 | 48  | 53        | 42 | 48  | 54            | 36 | 45  | 50          | 44 | 48  | 53        | 45 | 51  | 56            | 30 | 45  | 50          | 45 | 49  | 55        | 45 | 50  | 56            | 30 | 43  | 50 |    |
| 720  | 734  | 4 | 8.0  | 8.3             | 45 | 47  | 49        | 43 | 47  | 48            | 35 | 46  | 44          | 44 | 47  | 47        | 45 | 48  | 48            | 27 | 45  | 47          | 46 | 49  | 50        | 45 | 49  | 48            | 28 | 43  | 46 |    |
| 735  | 744  | 2 | 10.4 | 10.8            | 6  | 34  | 57        | 6  | 32  | 58            | 5  | 17  | 52          | 7  | 31  | 56        | 8  | 37  | 60            | 3  | 12  | 42          | 7  | 36  | 60        | 9  | 40  | 57            | 4  | 13  | 43 |    |
| 735  | 745  | 2 | 11.7 | 11.9            | 4  | 27  | 51        | 3  | 25  | 51            | 2  | 13  | 43          | 4  | 25  | 51        | 6  | 30  | 53            | 2  | 9   | 35          | 4  | 30  | 53        | 6  | 33  | 51            | 2  | 9   | 36 |    |
| 745  | 764  | 2 | 16.4 | 17.0            | 1  | 2   | 4         | 1  | 2   | 5             | 1  | 2   | 4           | 1  | 2   | 4         | 1  | 2   | 5             | 1  | 2   | 4           | 1  | 2   | 5         | 1  | 2   | 4             | 1  | 2   | 4  |    |
| 745  | 766  | 3 | 16.2 | 16.5            | 5  | 7   | 9         | 5  | 6   | 9             | 5  | 6   | 9           | 5  | 6   | 9         | 5  | 6   | 9             | 4  | 7   | 9           | 5  | 7   | 9         | 5  | 7   | 9             | 4  | 7   | 8  |    |
| 751  | 764  | 2 | 13.6 | 14.0            | 1  | 2   | 4         | 1  | 1   | 5             | 1  | 1   | 4           | 1  | 1   | 5         | 1  | 1   | 5             | 1  | 2   | 4           | 1  | 2   | 5         | 1  | 1   | 5             | 1  | 1   | 4  |    |
| 751  | 766  | 3 | 13.8 | 14.2            | 7  | 9   | 11        | 6  | 8   | 11            | 6  | 8   | 10          | 7  | 8   | 11        | 7  | 9   | 11            | 5  | 8   | 10          | 7  | 9   | 11        | 7  | 9   | 11            | 5  | 8   | 10 |    |
| 769  | 781  | 3 | 12.2 | 12.8            | 11 | 18  | 23        | 11 | 18  | 23            | 10 | 15  | 20          | 11 | 18  | 22        | 12 | 19  | 24            | 10 | 15  | 18          | 12 | 19  | 24        | 12 | 20  | 23            | 9  | 14  | 18 |    |
| 770  | 789  | 4 | 14.6 | 14.9            | 9  | 16  | 21        | 10 | 16  | 21            | 9  | 14  | 19          | 10 | 17  | 21        | 11 | 17  | 22            | 9  | 14  | 19          | 10 | 16  | 21        | 11 | 17  | 21            | 9  | 15  | 19 |    |
| 782  | 789  | 1 | 13.4 | 13.7            | 18 | 35  | 44        | 18 | 34  | 44            | 17 | 32  | 42          | 19 | 35  | 45        | 19 | 35  | 46            | 18 | 34  | 42          | 20 | 36  | 46        | 19 | 36  | 44            | 18 | 34  | 42 |    |
| 793  | 811  | 3 | 13.1 | 13.6            | 5  | 12  | 20        | 6  | 13  | 21            | 4  | 12  | 18          | 6  | 12  | 20        | 7  | 13  | 22            | 5  | 12  | 18          | 6  | 12  | 21        | 6  | 14  | 21            | 5  | 12  | 18 |    |
| 799  | 811  | 3 | 11.3 | 11.6            | 7  | 14  | 24        | 7  | 15  | 24            | 6  | 14  | 20          | 7  | 14  | 23        | 7  | 16  | 25            | 5  | 15  | 20          | 7  | 15  | 25        | 7  | 17  | 24            | 6  | 15  | 20 |    |
| 815  | 821  | 2 | 11.5 | 11.9            | 0  | 0   | 0         | 0  | 0   | 0             | 0  | 1   | 0           | 1  | 1   | 0         | 0  | 1   | 0             | 0  | 1   | 0           | 0  | 0   | 0         | 0  | 0   | 0             | 0  | 0   | 0  | 0  |
| 815  | 830  | 2 | 15.7 | 16.0            | 6  | 9   | 14        | 6  | 8   | 14            | 6  | 8   | 12          | 6  | 8   | 14        | 6  | 8   | 14            | 6  | 8   | 12          | 7  | 8   | 16        | 7  | 8   | 15            | 6  | 8   | 13 |    |
| 815  | 831  | 2 | 16.7 | 17.1            | 4  | 6   | 11        | 4  | 6   | 12            | 4  | 6   | 10          | 4  | 6   | 12        | 5  | 6   | 12            | 5  | 6   | 11          | 5  | 6   | 12        | 5  | 7   | 12            | 4  | 6   | 11 |    |
| 831  | 839  | 2 | 14.7 | 15.0            | 2  | 5   | 9         | 1  | 5   | 9             | 1  | 4   | 7           | 1  | 5   | 9         | 1  | 5   | 10            | 1  | 3   | 7           | 1  | 5   | 10        | 1  | 5   | 9             | 1  | 3   | 8  |    |
| 840  | 844  | 1 | 7.9  | 8.1             | 5  | 15  | 24        | 5  | 13  | 24            | 4  | 13  | 21          | 6  | 14  | 24        | 5  | 15  | 24            | 6  | 13  | 21          | 6  | 15  | 27        | 5  | 16  | 26            | 5  | 13  | 24 |    |
| 847  | 858  | 3 | 10.6 | 10.9            | 10 | 17  | 21        | 10 | 17  | 22            | 9  | 17  | 21          | 10 | 17  | 21        | 10 | 18  | 23            | 10 | 20  | 21          | 10 | 18  | 22        | 10 | 19  | 22            | 9  | 18  | 21 |    |
| 848  | 858  | 3 | 9.3  | 9.7             | 9  | 16  | 20        | 8  | 16  | 22            | 8  | 16  | 21          | 10 | 16  | 21        | 9  | 17  | 23            | 9  | 18  | 20          | 9  | 18  | 20        | 9  | 17  | 22            | 9  | 17  | 20 |    |
| 848  | 859  | 2 | 8.7  | 9.0             | 9  | 16  | 21        | 9  | 16  | 24            | 9  | 16  | 21          | 10 | 16  | 22        | 9  | 17  | 25            | 9  | 18  | 21          | 10 | 16  | 24        | 9  | 18  | 26            | 9  | 17  | 22 |    |
| 859  | 872  | 2 | 12.0 | 12.2            | 64 | 66  | 70        | 64 | 66  | 70            | 62 | 64  | 68          | 64 | 66  | 69        | 65 | 67  | 70            | 57 | 63  | 68          | 65 | 67  | 70        | 64 | 67  | 70            | 55 | 62  | 67 |    |
| 859  | 872  | 3 | 12.1 | 12.3            | 65 | 66  | 72        | 64 | 66  | 71            | 63 | 65  | 68          | 65 | 66  | 70        | 66 | 67  | 71            | 59 | 64  | 70          | 66 | 68  | 71        | 65 | 67  | 71            | 56 | 63  | 67 |    |
| 859  | 893  | 4 | 11.9 | 12.3            | 21 | 26  | 32        | 21 | 27  | 31            | 20 | 24  | 29          | 22 | 25  | 30        | 23 | 26  | 30            | 19 | 23  | 29          | 23 | 27  | 30        | 22 | 28  | 30            | 18 | 23  | 28 |    |
| 859  | 893  | 5 | 12.0 | 12.4            | 22 | 26  | 32        | 21 | 27  | 31            | 20 | 24  | 29          | 23 | 25  | 30        | 23 | 27  | 31            | 19 | 23  | 29          | 23 | 28  | 31        | 22 | 28  | 30            | 18 | 23  | 27 |    |
| 873  | 893  | 2 | 9.8  | 10.1            | 11 | 21  | 23        | 10 | 21  | 24            | 10 | 20  | 22          | 11 | 20  | 22        | 12 | 22  | 23            | 10 | 20  | 23          | 12 | 22  | 22        | 12 | 22  | 23            | 9  | 19  | 22 |    |
| 880  | 893  | 2 | 9.4  | 9.7             | 13 | 27  | 28        | 13 | 27  | 29            | 11 | 26  | 26          | 14 | 27  | 28        | 13 | 28  | 29            | 11 | 26  | 27          | 14 | 28  | 30        | 13 | 28  | 29            | 10 | 25  | 26 |    |
| 897  | 903  | 2 | 5.8  | 6.4             | 1  | 1   | 1         | 1  | 1   | 1             | 1  | 1   | 1           | 1  | 1   | 1         | 1  | 1   | 1             | 1  | 1   | 1           | 1  | 1   | 1         | 1  | 1   | 1             | 1  | 1   | 1  |    |
| 909  | 920  | 3 | 11.3 | 11.7            | 3  | 6   | 9         | 3  | 7   | 11            | 3  | 9   | 11          | 3  | 6   | 9         | 4  | 9   | 11            | 5  | 11  | 11          | 4  | 7   | 10        | 3  | 9   | 10            | 5  | 10  | 11 |    |
| 909  | 921  | 3 | 12.3 | 12.5            | 2  | 4   | 7         | 2  | 6   | 8             | 2  | 7   | 7           | 2  | 5   | 7         | 3  | 6   | 8             | 3  | 8   | 8           | 3  | 6   | 7         | 3  | 7   | 8             | 3  | 7   | 8  |    |
| 921  | 956  | 5 | 12.7 | 13.1            | 5  | 7   | 13        | 5  | 8   | 15            | 5  | 9   | 14          | 5  | 8   | 14        | 6  | 10  | 15            | 5  | 9   | 15          | 6  | 8   | 14        | 7  | 10  | 16            | 5  | 9   | 15 |    |
| 922  | 929  | 1 | 8.2  | 8.7             | 1  | 2   | 5         | 1  | 2   | 5             | 1  | 2   | 4           | 1  | 2   | 5         | 1  | 2   | 6             | 1  | 2   | 5           | 1  | 2   | 6         | 1  | 2   | 5             | 1  | 2   | 5  |    |
| 930  | 956  | 4 | 12.0 | 12.3            | 6  | 9   | 17        | 7  | 11  | 18            | 7  | 10  | 17          | 6  | 9   | 16        | 8  | 12  | 20            | 6  | 10  | 18          | 7  | 10  | 17        | 8  | 13  | 20            | 6  | 10  | 18 |    |
| 961  | 976  | 4 | 8.3  | 8.8             | 26 | 31  | 42        | 25 | 31  | 40            | 24 | 28  | 35          | 27 | 31  | 40        | 27 | 32  | 41            | 22 | 28  | 35          | 28 | 32  | 41        | 27 | 33  | 41            | 22 | 27  | 36 |    |
| 961  | 980  | 4 | 10.8 | 11.2            | 15 | 18  | 28        | 14 | 18  | 26            | 14 | 16  | 23          | 15 | 18  | 26        | 16 | 19  | 26            | 14 | 16  | 21          | 16 | 19  | 28        | 15 | 19  | 26            | 13 | 15  | 22 |    |
| 962  | 976  | 4 | 6.8  | 7.2             | 26 | 31  | 44        | 24 | 30  | 42            | 22 | 28  | 36          | 27 | 31  | 44        | 26 | 33  | 43            | 21 | 29  | 36          | 28 | 33  | 45        | 26 | 33  | 43            | 21 | 26  | 38 |    |
| 962  | 980  | 3 | 10.1 | 10.5            | 12 | 15  | 25        | 11 | 15  | 24            | 11 | 13  | 20          | 12 | 14  | 23        | 13 | 16  | 25            | 11 | 13  | 18          | 13 | 16  | 25        | 12 | 16  | 24            | 11 | 13  | 18 |    |
| 989  | 997  | 2 | 8.1  | 8.6             | 5  | 14  | 24        | 5  | 14  | 25            | 5  | 13  | 23          | 6  | 14  | 24        | 6  | 15  | 27            | 5  | 14  | 23          | 6  | 15  | 27        | 6  | 16  | 26            | 5  | 13  | 24 |    |
| 990  | 997  | 2 | 6.5  | 6.7             | 8  | 18  | 29        | 7  | 17  | 30            | 5  | 15  | 25          | 8  | 17  | 30        | 7  | 18  | 29            | 5  | 15  | 26          | 8  | 19  | 34        | 8  | 18  | 30            | 5  | 16  | 27 |    |
| 1002 | 1006 | 1 | 15.6 | 16.2            | 1  | 2   | 7         | 1  | 2   | 10            | 1  | 2   | 9           | 1  | 2   | 8         | 1  | 2   | 11            | 2  | 2   | 9           | 2  | 2   | 12        | 2  | 2   | 14            | 1  | 2   | 10 |    |
| 1022 | 1038 | 3 | 10.8 | 11.0            | 8  | 15  | 21        | 8  | 14  | 21            | 8  | 15  | 20          | 8  | 15  | 21        | 8  | 15  | 22            | 8  | 14  | 21          | 9  | 15  | 22        | 8  | 15  | 22            | 8  | 14  | 20 |    |
| 1029 | 1035 | 1 | 4.4  | 4.8             | 17 | 32  | 46        | 17 | 32  | 48            | 16 | 30  | 44          | 18 | 33  | 48        | 16 | 33  | 50            | 18 | 31  | 46          | 18 | 3   |           |    |     |               |    |     |    |    |

Fig. S3Acont  
p110α peptides

|     |                 | p110α E545K |    |     |           |    |     | p110α H1047R  |    |     |       |    |     | p110α G118D |    |     | p110α C420R   |    |     |       |    |    |       |    |    |
|-----|-----------------|-------------|----|-----|-----------|----|-----|---------------|----|-----|-------|----|-----|-------------|----|-----|---------------|----|-----|-------|----|----|-------|----|----|
| S   | E Z RT          | basal       |    |     | +PDGFR pY |    |     | +pY and lipid |    |     | basal |    |     | +PDGFR pY   |    |     | +pY and lipid |    |     | b p l |    |    | b p l |    |    |
|     |                 | 3           | 30 | 300 | 3         | 30 | 300 | 3             | 30 | 300 | 3     | 30 | 300 | 3           | 30 | 300 | 3             | 30 | 300 | 3     | 3  | 3  | 3     | 3  | 3  |
| 11  | 23 3 14.4 14.6  | 16          | 29 | 43  | 16        | 29 | 42  | 18            | 31 | 43  | 20    | 33 | 43  | 21          | 33 | 43  | 23            | 35 | 43  | 22    | 25 | 25 | 24    | 25 | 24 |
| 37  | 42 2 8.9 9.4    | 1           | 1  | 4   | 0         | 1  | 4   | 0             | 0  | 6   | 0     | 1  | 4   | 0           | 1  | 4   | 0             | 0  | 7   | 1     | 1  | 0  | 1     | 1  | 0  |
| 43  | 68 3 11.6 12.2  | 4           | 15 | 25  | 6         | 15 | 25  | 5             | 15 | 24  | 6     | 16 | 26  | 7           | 16 | 26  | 5             | 15 | 26  | 6     | 5  | 5  | 6     | 6  | 5  |
| 71  | 76 1 6.8 7.1    | 0           | 5  | 19  | 1         | 7  | 19  | 1             | 15 | 19  | 0     | 5  | 19  | 1           | 8  | 19  | 1             | 16 | 20  | 0     | 1  | 2  | 0     | 2  | 2  |
| 71  | 82 2 11.1 11.6  | 3           | 14 | 23  | 4         | 15 | 23  | 4             | 15 | 23  | 4     | 15 | 23  | 4           | 15 | 23  | 5             | 17 | 23  | 4     | 5  | 5  | 4     | 6  | 5  |
| 83  | 92 2 11.9 12.3  | 1           | 1  | 4   | 1         | 1  | 4   | 0             | 1  | 6   | 0     | 1  | 4   | 1           | 1  | 4   | 1             | 1  | 6   | 0     | 0  | 1  | 1     | 1  | 0  |
| 92  | 99 2 16.2 16.6  | 0           | 0  | 2   | 1         | 1  | 2   | 1             | 0  | 4   | 0     | 0  | 2   | 0           | 1  | 2   | 1             | 1  | 4   | 1     | 1  | 0  | 1     | 1  | 1  |
| 92  | 113 5 14.2 14.7 | 12          | 20 | 31  | 14        | 21 | 31  | 18            | 29 | 33  | 13    | 20 | 30  | 14          | 22 | 32  | 20            | 29 | 33  | 16    | 22 | 23 | 14    | 18 | 21 |
| 92  | 119 4 14.8 15.1 | 11          | 20 | 33  | 13        | 23 | 35  | 20            | 34 | 41  | 12    | 18 | 31  | 14          | 23 | 36  | 21            | 37 | 42  | 15    | 26 | 28 | 13    | 19 | 23 |
| 93  | 99 2 15.3 15.9  | 1           | 1  | 1   | 1         | 1  | 1   | 1             | 1  | 1   | 1     | 2  | 1   | 1           | 0  | 1   | 1             | 1  | 1   | 1     | 1  | 1  | 1     | 1  | 1  |
| 93  | 119 5 13.6 14.4 | 12          | 20 | 33  | 14        | 23 | 36  | 21            | 36 | 43  | 12    | 19 | 32  | 14          | 24 | 37  | 22            | 37 | 44  | ##    | ## | ## | 13    | 20 | 24 |
| 100 | 109 2 6.5 6.6   | 36          | 50 | 56  | 38        | 50 | 55  | 43            | 56 | 53  | 39    | 50 | 57  | 39          | 54 | 53  | 44            | 55 | 54  | 41    | 41 | 42 | 42    | 45 | 46 |
| 100 | 119 4 11.5 11.9 | 11          | 21 | 40  | 13        | 26 | 42  | 23            | 43 | 51  | 11    | 19 | 37  | 13          | 26 | 44  | 25            | 44 | 54  | 19    | 34 | 37 | 13    | 22 | 29 |
| 120 | 127 1 11.8 12.1 | 6           | 19 | 32  | 9         | 21 | 36  | 14            | 34 | 52  | 5     | 18 | 31  | 10          | 23 | 37  | 15            | 37 | 56  | 6     | 8  | 9  | 9     | 16 | 18 |
| 120 | 128 1 15.3 15.7 | 5           | 20 | 34  | 7         | 21 | 37  | 11            | 31 | 51  | 5     | 18 | 34  | 7           | 23 | 39  | 11            | 33 | 53  | 6     | 7  | 7  | 7     | 13 | 13 |
| 129 | 139 2 10.3 11.1 | 12          | 25 | 35  | 13        | 23 | 33  | 12            | 25 | 32  | 14    | 24 | 35  | 12          | 26 | 34  | 12            | 25 | 35  | 16    | 13 | 13 | 14    | 13 | 13 |
| 129 | 146 4 13.1 13.3 | 8           | 20 | 25  | 9         | 19 | 25  | 8             | 18 | 25  | 9     | 18 | 25  | 9           | 20 | 26  | 8             | 18 | 25  | 11    | 9  | 8  | 10    | 9  | 8  |
| 140 | 146 2 9.9 10.1  | 11          | 28 | 33  | 12        | 28 | 32  | 10            | 26 | 31  | 13    | 28 | 33  | 13          | 29 | 33  | 9             | 27 | 32  | 13    | 12 | 8  | 14    | 12 | 9  |
| 145 | 152 2 6.7 7.0   | 2           | 2  | 5   | 2         | 2  | 5   | 1             | 2  | 4   | 2     | 2  | 4   | 1           | 3  | 4   | 1             | 3  | 5   | 2     | 2  | 1  | 2     | 2  | 2  |
| 145 | 164 4 10.0 10.2 | 8           | 11 | 21  | 8         | 10 | 21  | 8             | 10 | 20  | 8     | 10 | 20  | 8           | 11 | 21  | 8             | 10 | 20  | 9     | 8  | 8  | 9     | 9  | 8  |
| 154 | 164 3 5.6 6.0   | 11          | 16 | 30  | 12        | 16 | 28  | 12            | 16 | 26  | 13    | 16 | 29  | 13          | 17 | 28  | 12            | 17 | 28  | 15    | 13 | 13 | 14    | 14 | 13 |
| 165 | 192 3 12.0 12.3 | 20          | 28 | 40  | 23        | 28 | 38  | 21            | 28 | 34  | 22    | 28 | 40  | 22          | 29 | 40  | 21            | 27 | 36  | 22    | 22 | 21 | 23    | 22 | 21 |
| 165 | 193 4 12.1 12.6 | 18          | 26 | 37  | 20        | 26 | 35  | 19            | 26 | 34  | 20    | 27 | 37  | 20          | 27 | 37  | 20            | 27 | 34  | 21    | 20 | 19 | 21    | 21 | 19 |
| 193 | 209 3 13.8 14.1 | 18          | 31 | 37  | 20        | 31 | 36  | 18            | 30 | 35  | 20    | 31 | 38  | 19          | 33 | 38  | 19            | 30 | 35  | 21    | 19 | 18 | 20    | 20 | 18 |
| 223 | 233 2 6.4 6.7   | 31          | 35 | 43  | 35        | 39 | 43  | 33            | 38 | 38  | 35    | 39 | 43  | 35          | 40 | 43  | 33            | 41 | 41  | 35    | 35 | 33 | 36    | 34 | 33 |
| 224 | 233 3 5.5 6.2   | 30          | 34 | 39  | 32        | 35 | 39  | 30            | 35 | 33  | 34    | 36 | 39  | 33          | 37 | 39  | 31            | 36 | 37  | 33    | 32 | 31 | 34    | 32 | 30 |
| 234 | 241 2 11.3 11.6 | 66          | 70 | 71  | 69        | 69 | 68  | 70            | 71 | 71  | 70    | 69 | 71  | 68          | 71 | 69  | 72            | 72 | 71  | 71    | 68 | 68 | 68    | 69 | 68 |
| 244 | 252 2 12.7 13.1 | 43          | 53 | 53  | 47        | 52 | 53  | 46            | 52 | 52  | 47    | 51 | 53  | 46          | 54 | 53  | 46            | 53 | 52  | 48    | 46 | 44 | 47    | 47 | 45 |
| 253 | 259 1 6.3 6.8   | 2           | 7  | 10  | 3         | 8  | 9   | 3             | 8  | 9   | 3     | 7  | 10  | 2           | 8  | 9   | 2             | 9  | 9   | 3     | 4  | 3  | 3     | 3  | 2  |
| 260 | 275 4 12.0 12.4 | 12          | 14 | 18  | 12        | 13 | 18  | 12            | 14 | 17  | 12    | 13 | 18  | 13          | 13 | 19  | 13            | 13 | 18  | 12    | 13 | 12 | 13    | 12 | 12 |
| 262 | 275 3 10.3 10.8 | 9           | 10 | 12  | 11        | 10 | 11  | 10            | 11 | 11  | 11    | 10 | 11  | 10          | 10 | 11  | 11            | 11 | 11  | 11    | 10 | 10 | 11    | 11 | 10 |
| 270 | 275 2 7.2 7.7   | 18          | 19 | 20  | 20        | 19 | 20  | 19            | 19 | 19  | 21    | 19 | 21  | 19          | 20 | 20  | 19            | 19 | 20  | 21    | 19 | 19 | 20    | 19 | 19 |
| 279 | 285 2 11.3 11.8 | 21          | 29 | 39  | 21        | 29 | 38  | 20            | 28 | 36  | 22    | 29 | 39  | 22          | 30 | 39  | 20            | 26 | 37  | 22    | 21 | 21 | 22    | 22 | 21 |
| 279 | 287 2 14.2 14.5 | 12          | 17 | 23  | 12        | 16 | 22  | 12            | 16 | 21  | 13    | 16 | 22  | 12          | 17 | 22  | 12            | 16 | 21  | 13    | 12 | 12 | 13    | 13 | 13 |
| 294 | 301 1 12.4 12.5 | 33          | 51 | 60  | 35        | 49 | 59  | 35            | 51 | 57  | 38    | 51 | 60  | 35          | 53 | 58  | 37            | 52 | 57  | 39    | 35 | 35 | 39    | 38 | 36 |
| 302 | 327 4 11.2 11.8 | 34          | 40 | 46  | 40        | 40 | 46  | 40            | 42 | 47  | 39    | 40 | 47  | 38          | 42 | 47  | 43            | 44 | 48  | 39    | 37 | 38 | 39    | 40 | 39 |
| 308 | 327 3 9.2 9.5   | 40          | 47 | 54  | 46        | 48 | 53  | 46            | 51 | 55  | 47    | 46 | 53  | 45          | 51 | 54  | 49            | 52 | 57  | 46    | 43 | 45 | 45    | 46 | 46 |
| 321 | 327 2 6.6 6.8   | 22          | 41 | 53  | 24        | 42 | 53  | 24            | 44 | 47  | 25    | 41 | 51  | 23          | 44 | 52  | 23            | 41 | 54  | 26    | 24 | 23 | 26    | 26 | 23 |
| 328 | 334 2 14.4 14.9 | 24          | 30 | 34  | 27        | 29 | 34  | 27            | 32 | 34  | 28    | 29 | 33  | 26          | 32 | 32  | 28            | 31 | 38  | 27    | 27 | 26 | 27    | 27 | 25 |
| 335 | 340 2 10.0 10.2 | 0           | 0  | 1   | 0         | 0  | 0   | 1             | 0  | 1   | 0     | 0  | 1   | 0           | 0  | 1   | 0             | -1 | 0   | 0     | 0  | 0  | 0     | 0  | 1  |
| 335 | 341 2 10.3 10.6 | 0           | 1  | 3   | 0         | 1  | 2   | 0             | 0  | 1   | 0     | 0  | 2   | 0           | 1  | 1   | 0             | 1  | 1   | 1     | 1  | 0  | 1     | 0  | 0  |
| 335 | 342 2 9.5 10.0  | 1           | 6  | 18  | 1         | 5  | 17  | 1             | 2  | 13  | 1     | 6  | 18  | 1           | 5  | 17  | 1             | 2  | 12  | 1     | 1  | 1  | 1     | 1  | 1  |
| 343 | 350 2 9.5 9.7   | 71          | 81 | 84  | 78        | 82 | 82  | 78            | 84 | 80  | 68    | 81 | 82  | 78          | 84 | 80  | 79            | 81 | 80  | 76    | 81 | 81 | 83    | 83 | 79 |
| 343 | 354 3 12.2 12.4 | 45          | 56 | 63  | 49        | 56 | 61  | 49            | 59 | 61  | 44    | 54 | 62  | 50          | 58 | 63  | 49            | 60 | 61  | 50    | 53 | 49 | 55    | 54 | 49 |
| 343 | 369 3 12.9 13.3 | 17          | 22 | 26  | 19        | 21 | 25  | 18            | 22 | 24  | 17    | 21 | 25  | 19          | 22 | 25  | 19            | 22 | 24  | 18    | 19 | 17 | 21    | 21 | 18 |
| 356 | 369 2 9.7 9.9   | 3           | 5  | 6   | 3         | 5  | 6   | 3             | 6  | 6   | 3     | 4  | 6   | 3           | 6  | 6   | 4             | 6  | 7   | 3     | 3  | 3  | 4     | 3  | 3  |
| 370 | 386 2 12.5 13.1 | 12          | 28 | 40  | 13        | 26 | 40  | 13            | 26 | 37  | 13    | 28 | 40  | 14          | 29 | 40  | 12            | 27 | 37  | 14    | 14 | 11 | 15    | 15 | 12 |
| 370 | 389 2 14.0 14.4 | 9           | 23 | 35  | 10        | 22 | 35  | 8             | 20 | 32  | 9     | 22 | 36  | 10          | 22 | 35  | 8             | 21 | 32  | 9     | 9  | 7  | 10    | 10 | 8  |
| 390 | 402 2 13.3 13.7 | 1           | 4  | 10  | 1         | 2  | 9   | 1             | 2  | 8   | 1     | 4  | 10  | 1           | 2  | 8   | 1             | 1  | 7   | 1     | 1  | 1  | 1     | 1  | 1  |
| 391 | 402 3 12.6 13.0 | 1           | 1  | 1   | 1         | 1  | 1   | 1             | 1  | 1   | 1     | 1  | 1   | 1           | 1  | 1   | 0             | 1  | 1   | 1     | 0  | 1  | 1     | 1  | 1  |
| 405 | 429 3 12.2 12.8 | 2           | 3  | 7   | 3         | 4  | 7   | 3             | 4  | 7   | 3     | 3  | 6   | 3           | 4  | 7   | 4             | 4  | 7   | 3     | 3  | 3  | 3     | 3  | 2  |
| 430 | 443 2 14.1 14.5 | 10          | 17 | 26  | 10        | 17 | 26  | 10            | 17 | 25  | 10    | 18 | 27  | 11          | 18 | 27  | 9             | 17 | 26  | 11    | 10 | 9  | 11    | 10 | 9  |
| 437 | 443 2 9.5 9.8   | 24          | 41 | 43  | 24        | 39 | 42  | 22            | 40 | 42  | 24    | 35 | 43  | 24          | 41 | 43  | 21            | 40 | 43  | 25    | 24 | 21 | 24    | 24 | 21 |
| 444 | 455 2 15.4 15.8 | 19          | 40 | 43  | 22        | 40 | 42  | 25            | 41 | 41  | 13    | 34 | 43  | 21          | 41 | 43  | 25            | 41 | 42  | 15    | 28 | 27 | 26    | 31 | 28 |
| 444 | 475 3 16.7 17.0 | 10          | 22 | 34  | 12        | 23 | 35  | 13            | 23 | 34  | 8     | 19 | 32  | 11          | 23 | 35  | 12            | 23 | 34  | 9     | 13 | 12 | 13    | 15 | 13 |
| 455 | 473 2 12.7 13.3 | 10          | 20 | 42  | 12        | 22 | 44  | 11            | 22 | 42  | 10    | 18 | 38  | 11          | 22 | 44  | 11            | 23 | 43  | 10    | 11 | 10 | 12    | 12 | 11 |
| 456 | 473 2 11.8 12.0 | 11          | 23 | 46  | 13        | 24 | 48  | 13            | 25 | 49  | 12    | 20 | 42  | 12          | 25 | 48  | 13            | 25 | 49  | 12    | 12 | 12 | 13    | 14 | 12 |
| 483 | 489 2 12.4 13.0 | 16          | 18 | 23  | 15        | 16 | 20  | 16            | 17 | 18  | 17    | 17 | 24  | 15          | 17 | 21  | 16            | 17 | 21  | 17    | 15 | 16 | 17    | 17 | 16 |
| 483 | 491 2 12.6 12.9 | 22          | 28 | 44  | 23        | 27 | 42  | 23            | 27 | 42  | 24    | 28 | 43  | 23          | 27 | 42  | 24            | 27 | 40  | 24    | 22 | 22 | 25    | 24 | 23 |
| 492 | 498 1 10.3 10.6 | 18          | 33 | 36  | 19        | 34 | 36  | 18            | 35 | 36  | 17    | 33 | 37  | 18          | 36 | 38  | 15            | 37 | 37  | 18    | 17 | 15 | 18    | 18 | 15 |
| 499 | 505 1 4.4 4.8   | 65          | 65 | 72  | 67        | 68 | 69  | 68            | 69 | 67  | 71    | 67 | 70  | 68          | 70 | 73  | 74            | 72 | 69  | 72    | 69 | 68 | 71    | 69 | 71 |
| 507 | 523 2 9.5 9.7   | 35          | 38 | 41  | 40        | 3  |     |               |    |     |       |    |     |             |    |     |               |    |     |       |    |    |       |    |    |

Fig.S3Acont  
p110 $\alpha$  peptides

| S    | E    | Z | RT   | p110 $\alpha$ E545K |           |               | p110 $\alpha$ H1047R |           |               | p110 $\alpha$ G118D |    |     | p110 $\alpha$ C420R |    |    |    |    |    |    |
|------|------|---|------|---------------------|-----------|---------------|----------------------|-----------|---------------|---------------------|----|-----|---------------------|----|----|----|----|----|----|
|      |      |   |      | basal               | +PDGFR pY | +pY and lipid | basal                | +PDGFR pY | +pY and lipid | b                   | p  | l   | b                   | p  | l  |    |    |    |    |
|      |      |   |      | 3                   | 30        | 300           | 3                    | 30        | 300           | 3                   | 30 | 300 | 3                   | 3  | 3  | 3  | 3  | 3  |    |
| 602  | 618  | 3 | 13.6 | 13.9                | 1         | 4             | 9                    | 1         | 4             | 8                   | 1  | 4   | 9                   | 1  | 1  | 1  | 1  | 1  | 2  |
| 602  | 632  | 5 | 16.7 | 17.0                | 5         | 10            | 21                   | 5         | 9             | 20                  | 5  | 9   | 20                  | 5  | 5  | 5  | 6  | 5  | 5  |
| 635  | 648  | 2 | 16.0 | 16.6                | 3         | 11            | 17                   | 3         | 11            | 17                  | 3  | 11  | 17                  | 3  | 3  | 3  | 3  | 3  | 3  |
| 649  | 666  | 4 | 11.2 | 11.7                | 0         | 0             | 0                    | 0         | 0             | 0                   | 0  | 0   | 1                   | 0  | 0  | 0  | 0  | 0  | 0  |
| 667  | 671  | 2 | 16.0 | 16.4                | 2         | 1             | 2                    | 1         | 2             | 1                   | 1  | 1   | 0                   | 1  | 1  | 1  | 2  | 2  | 2  |
| 667  | 687  | 5 | 12.9 | 13.4                | 3         | 5             | 12                   | 3         | 5             | 12                  | 3  | 5   | 12                  | 3  | 4  | 3  | 4  | 4  | 3  |
| 676  | 687  | 2 | 11.5 | 11.7                | 4         | 8             | 21                   | 5         | 8             | 20                  | 4  | 9   | 19                  | 5  | 5  | 5  | 5  | 6  | 6  |
| 691  | 697  | 1 | 8.8  | 9.0                 | 28        | 29            | 31                   | 29        | 29            | 30                  | 26 | 29  | 29                  | 29 | 29 | 30 | 29 | 30 | 28 |
| 698  | 708  | 2 | 6.9  | 7.2                 | 0         | 1             | 2                    | 0         | 1             | 2                   | 0  | 1   | 2                   | 0  | 0  | 1  | 0  | 0  | 0  |
| 698  | 709  | 2 | 8.3  | 8.7                 | 0         | 1             | 1                    | 0         | 1             | 1                   | 0  | 1   | 1                   | 0  | 1  | 1  | 0  | 0  | 0  |
| 698  | 734  | 4 | 12.9 | 13.3                | 20        | 23            | 29                   | 22        | 24            | 29                  | 19 | 22  | 24                  | 21 | 25 | 29 | 17 | 21 | 27 |
| 716  | 734  | 3 | 9.7  | 9.8                 | 39        | 47            | 54                   | 43        | 49            | 53                  | 35 | 45  | 49                  | 44 | 48 | 55 | 33 | 44 | 51 |
| 720  | 734  | 4 | 8.0  | 8.3                 | 41        | 46            | 48                   | 44        | 48            | 47                  | 34 | 45  | 45                  | 44 | 48 | 48 | 32 | 43 | 47 |
| 735  | 744  | 2 | 10.4 | 10.8                | 6         | 34            | 60                   | 7         | 33            | 58                  | 5  | 14  | 48                  | 7  | 36 | 59 | 4  | 12 | 42 |
| 735  | 745  | 2 | 11.7 | 11.9                | 4         | 26            | 54                   | 4         | 28            | 52                  | 2  | 10  | 41                  | 5  | 30 | 55 | 1  | 9  | 35 |
| 745  | 764  | 2 | 16.4 | 17.0                | 1         | 2             | 5                    | 1         | 2             | 5                   | 1  | 2   | 5                   | 1  | 2  | 5  | 1  | 2  | 5  |
| 745  | 766  | 3 | 16.2 | 16.5                | 5         | 7             | 9                    | 5         | 7             | 9                   | 5  | 6   | 9                   | 5  | 7  | 9  | 4  | 6  | 9  |
| 751  | 764  | 2 | 13.6 | 14.0                | 1         | 2             | 5                    | 1         | 1             | 5                   | 1  | 1   | 5                   | 1  | 1  | 5  | 1  | 1  | 5  |
| 751  | 766  | 3 | 13.8 | 14.2                | 6         | 8             | 11                   | 7         | 8             | 11                  | 6  | 8   | 10                  | 7  | 8  | 11 | 5  | 8  | 11 |
| 769  | 781  | 3 | 12.2 | 12.8                | 9         | 18            | 24                   | 11        | 18            | 24                  | 10 | 15  | 20                  | 12 | 19 | 25 | 11 | 20 | 25 |
| 770  | 789  | 4 | 14.6 | 14.9                | 8         | 17            | 23                   | 10        | 17            | 22                  | 9  | 15  | 20                  | 9  | 17 | 22 | 10 | 17 | 21 |
| 782  | 789  | 1 | 13.4 | 13.7                | 18        | 35            | 47                   | 18        | 34            | 46                  | 18 | 33  | 43                  | 19 | 36 | 48 | 18 | 34 | 44 |
| 793  | 811  | 3 | 13.1 | 13.6                | 5         | 12            | 22                   | 6         | 13            | 22                  | 5  | 11  | 19                  | 6  | 15 | 23 | 5  | 11 | 19 |
| 799  | 811  | 3 | 11.3 | 11.6                | 6         | 15            | 24                   | 6         | 15            | 24                  | 6  | 15  | 20                  | 6  | 15 | 25 | 7  | 17 | 24 |
| 815  | 821  | 2 | 11.5 | 11.9                | 1         | 1             | 1                    | 0         | 0             | 0                   | 0  | 0   | 0                   | 1  | 0  | 1  | 0  | 1  | 0  |
| 815  | 830  | 2 | 15.7 | 16.0                | 6         | 9             | 15                   | 6         | 8             | 15                  | 5  | 7   | 13                  | 6  | 9  | 16 | 5  | 7  | 13 |
| 815  | 831  | 2 | 16.7 | 17.1                | 4         | 6             | 13                   | 4         | 6             | 12                  | 4  | 5   | 11                  | 4  | 6  | 13 | 4  | 6  | 11 |
| 831  | 839  | 2 | 14.7 | 15.0                | 2         | 5             | 10                   | 2         | 5             | 10                  | 1  | 4   | 8                   | 2  | 5  | 11 | 1  | 3  | 9  |
| 840  | 844  | 1 | 7.9  | 8.1                 | 4         | 14            | 26                   | 5         | 13            | 24                  | 5  | 14  | 22                  | 5  | 14 | 25 | 5  | 13 | 24 |
| 847  | 858  | 3 | 10.6 | 10.9                | 9         | 17            | 22                   | 10        | 17            | 23                  | 9  | 18  | 22                  | 10 | 20 | 27 | 10 | 21 | 30 |
| 848  | 858  | 3 | 9.3  | 9.7                 | 8         | 16            | 23                   | 9         | 16            | 23                  | 8  | 17  | 21                  | 10 | 18 | 27 | 9  | 22 | 30 |
| 848  | 859  | 2 | 8.7  | 9.0                 | 8         | 17            | 25                   | 9         | 17            | 24                  | 9  | 17  | 23                  | 10 | 19 | 33 | 10 | 23 | 37 |
| 859  | 872  | 2 | 12.0 | 12.2                | 63        | 65            | 71                   | 65        | 67            | 68                  | 62 | 65  | 65                  | 65 | 68 | 72 | 65 | 69 | 73 |
| 859  | 872  | 3 | 12.1 | 12.3                | 63        | 66            | 70                   | 64        | 67            | 69                  | 62 | 64  | 66                  | 67 | 69 | 74 | 65 | 69 | 73 |
| 859  | 893  | 4 | 11.9 | 12.3                | 19        | 25            | 31                   | 21        | 26            | 30                  | 21 | 26  | 32                  | 21 | 27 | 32 | 20 | 22 | 28 |
| 859  | 893  | 5 | 12.0 | 12.4                | 19        | 25            | 31                   | 21        | 25            | 31                  | 19 | 23  | 28                  | 21 | 27 | 32 | 19 | 22 | 28 |
| 873  | 893  | 2 | 9.8  | 10.1                | 10        | 20            | 23                   | 11        | 21            | 23                  | 10 | 20  | 22                  | 11 | 21 | 24 | 12 | 21 | 25 |
| 880  | 893  | 2 | 9.4  | 9.7                 | 12        | 27            | 30                   | 14        | 27            | 28                  | 12 | 27  | 27                  | 14 | 26 | 29 | 13 | 28 | 30 |
| 897  | 903  | 2 | 5.8  | 6.4                 | 1         | 1             | 1                    | 1         | 1             | 1                   | 1  | 1   | 1                   | 1  | 1  | 1  | 1  | 1  | 0  |
| 909  | 920  | 3 | 11.3 | 11.7                | 2         | 7             | 11                   | 3         | 8             | 11                  | 4  | 10  | 11                  | 6  | 9  | 13 | 7  | 12 | 15 |
| 909  | 921  | 3 | 12.3 | 12.5                | 2         | 5             | 8                    | 2         | 6             | 8                   | 3  | 7   | 8                   | 5  | 7  | 10 | 5  | 8  | 11 |
| 921  | 956  | 5 | 12.7 | 13.1                | 5         | 8             | 15                   | 6         | 9             | 14                  | 5  | 9   | 15                  | 7  | 13 | 17 | 8  | 15 | 18 |
| 922  | 929  | 1 | 8.2  | 8.7                 | 1         | 2             | 5                    | 1         | 2             | 5                   | 1  | 2   | 5                   | 1  | 2  | 6  | 1  | 2  | 5  |
| 930  | 956  | 4 | 12.0 | 12.3                | 6         | 10            | 18                   | 7         | 11            | 18                  | 6  | 10  | 17                  | 8  | 15 | 20 | 10 | 18 | 22 |
| 961  | 976  | 4 | 8.3  | 8.8                 | 23        | 30            | 42                   | 27        | 32            | 39                  | 23 | 30  | 37                  | 30 | 36 | 43 | 28 | 37 | 44 |
| 961  | 980  | 4 | 10.8 | 11.2                | 13        | 18            | 27                   | 15        | 19            | 27                  | 13 | 15  | 22                  | 17 | 25 | 36 | 17 | 24 | 36 |
| 962  | 976  | 4 | 6.8  | 7.2                 | 22        | 30            | 43                   | 26        | 32            | 40                  | 22 | 28  | 36                  | 30 | 37 | 44 | 28 | 37 | 43 |
| 962  | 980  | 3 | 10.1 | 10.5                | 10        | 15            | 26                   | 12        | 15            | 24                  | 11 | 13  | 19                  | 15 | 21 | 34 | 14 | 21 | 33 |
| 989  | 997  | 2 | 8.1  | 8.6                 | 5         | 13            | 26                   | 6         | 14            | 25                  | 6  | 14  | 23                  | 6  | 12 | 26 | 6  | 14 | 25 |
| 990  | 997  | 2 | 6.5  | 6.7                 | 8         | 17            | 32                   | 7         | 16            | 29                  | 5  | 15  | 26                  | 8  | 16 | 31 | 7  | 17 | 29 |
| 1002 | 1006 | 1 | 15.6 | 16.2                | 1         | 2             | 12                   | 1         | 2             | 12                  | 1  | 2   | 10                  | 2  | 3  | 10 | 1  | 2  | 11 |
| 1022 | 1038 | 3 | 10.8 | 11.0                | 8         | 15            | 22                   | 8         | 15            | 21                  | 8  | 14  | 20                  | 10 | 15 | 25 | 10 | 15 | 25 |
| 1029 | 1035 | 1 | 4.4  | 4.8                 | 16        | 31            | 50                   | 17        | 32            | 48                  | 16 | 29  | 45                  | 21 | 33 | 48 | 20 | 34 | 50 |
| 1039 | 1055 | 2 | 9.4  | 9.7                 | 15        | 19            | 22                   | 17        | 20            | 21                  | 16 | 20  | 20                  | 34 | 35 | 42 | 31 | 34 | 41 |
| 1056 | 1068 | 4 | 12.6 | 13.0                | 47        | 50            | 54                   | 53        | 51            | 52                  | 42 | 49  | 53                  | 50 | 52 | 54 | 50 | 53 | 55 |
| 1060 | 1068 | 2 | 4.9  | 5.3                 | 45        | 48            | 52                   | 48        | 49            | 50                  | 42 | 49  | 48                  | 51 | 49 | 51 | 48 | 51 | 51 |

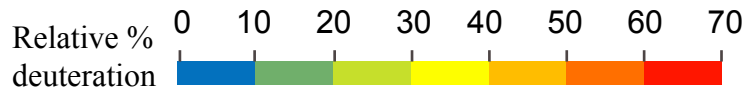





Fig. S3B cont

p85α peptides

| S   | E   | Z | RT   | p110α E545K |    |     |           |    |     |               |    |     | p110α H1047R |    |     |           |    |     |               |    |     | p110α G118D |    |    | p110α C420R |    |    |    |
|-----|-----|---|------|-------------|----|-----|-----------|----|-----|---------------|----|-----|--------------|----|-----|-----------|----|-----|---------------|----|-----|-------------|----|----|-------------|----|----|----|
|     |     |   |      | basal       |    |     | +PDGFR pY |    |     | +pY and lipid |    |     | basal        |    |     | +PDGFR pY |    |     | +pY and lipid |    |     | b           | p  | l  | b           | p  | l  |    |
|     |     |   |      | 3           | 30 | 300 | 3         | 30 | 300 | 3             | 30 | 300 | 3            | 30 | 300 | 3         | 30 | 300 | 3             | 30 | 300 | 3           | 3  | 3  | 3           | 3  | 3  |    |
| 6   | 13  | 1 | 11.1 | 1           | 2  | 6   | 1         | 1  | 6   | 1             | 2  | 6   | 1            | 2  | 7   | 2         | 2  | 5   | 2             | 1  | 5   | 2           | 1  | 1  | 1           | 1  | 1  | 1  |
| 8   | 13  | 2 | 9.8  | 1           | 2  | 7   | 1         | 1  | 6   | 2             | 2  | 6   | 1            | 1  | 7   | 1         | 1  | 6   | 1             | 2  | 6   | 2           | 1  | 1  | 2           | 1  | 1  | 2  |
| 14  | 21  | 2 | 4.1  | 18          | 26 | 29  | 21        | 26 | 28  | 21            | 27 | 28  | 22           | 25 | 28  | 21        | 27 | 28  | 21            | 27 | 29  | 22          | 20 | 19 | 22          | 21 | 20 | 20 |
| 22  | 30  | 2 | 15.1 | 1           | 3  | 9   | 1         | 3  | 9   | 1             | 3  | 10  | 1            | 3  | 9   | 1         | 3  | 9   | 1             | 4  | 10  | 1           | 1  | 1  | 1           | 1  | 1  | 1  |
| 25  | 30  | 1 | 12.0 | 0           | 0  | 0   | 0         | 0  | 0   | 1             | 0  | 1   | 0            | 0  | 0   | 0         | 0  | 0   | 0             | 1  | 0   | 0           | 0  | 0  | 0           | 0  | 0  | 1  |
| 31  | 37  | 1 | 6.8  | 69          | 72 | 74  | 72        | 72 | 73  | 72            | 73 | 75  | 73           | 73 | 74  | 71        | 73 | 73  | 73            | 74 | 74  | 73          | 71 | 71 | 73          | 71 | 71 | 71 |
| 38  | 52  | 2 | 10.8 | 30          | 51 | 58  | 36        | 51 | 58  | 36            | 51 | 58  | 36           | 51 | 58  | 36        | 53 | 58  | 35            | 51 | 59  | 35          | 35 | 33 | 35          | 36 | 33 |    |
| 53  | 60  | 1 | 14.5 | 5           | 16 | 22  | 5         | 15 | 22  | 5             | 16 | 22  | 5            | 16 | 22  | 5         | 16 | 21  | 5             | 16 | 22  | 6           | 5  | 5  | 6           | 5  | 5  |    |
| 53  | 73  | 2 | 14.5 | 4           | 12 | 18  | 4         | 12 | 19  | 4             | 12 | 19  | 4            | 12 | 18  | 4         | 12 | 19  | 4             | 12 | 19  | 5           | 4  | 4  | 4           | 4  | 4  |    |
| 73  | 102 | 4 | 8.1  | 48          | 55 | 58  | 52        | 55 | 59  | 53            | 56 | 60  | 52           | 54 | 59  | 51        | 57 | 59  | 55            | 56 | 61  | 53          | 51 | 51 | 52          | 52 | 51 |    |
| 73  | 106 | 4 | 7.8  | 43          | 49 | 53  | 47        | 49 | 53  | 48            | 51 | 54  | 47           | 48 | 53  | 46        | 51 | 53  | 50            | 51 | 55  | 48          | 45 | 47 | 47          | 47 | 47 |    |
| 77  | 107 | 4 | 6.5  | 48          | 52 | 55  | 54        | 52 | 55  | 55            | 55 | 56  | 54           | 51 | 55  | 53        | 54 | 55  | 58            | 56 | 57  | 55          | 52 | 53 | 54          | 54 | 54 |    |
| 124 | 132 | 1 | 15.2 | 5           | 15 | 25  | 2         | 13 | 12  | 4             | 13 | 20  | 4            | 8  | 26  | 5         | 15 | 11  | 4             | 12 | 21  | 7           | 4  | 4  | 6           | 5  | 4  |    |
| 133 | 146 | 3 | 11.4 | 7           | 18 | 29  | 8         | 18 | 29  | 8             | 18 | 29  | 8            | 18 | 29  | 8         | 19 | 29  | 8             | 18 | 29  | 8           | 7  | 7  | 8           | 8  | 7  |    |
| 133 | 149 | 2 | 12.9 | 14          | 26 | 39  | 15        | 26 | 39  | 15            | 24 | 39  | 15           | 27 | 40  | 15        | 27 | 41  | 14            | 26 | 39  | 15          | 15 | 14 | 15          | 15 | 14 |    |
| 138 | 146 | 1 | 7.1  | 11          | 27 | 43  | 12        | 28 | 41  | 13            | 28 | 42  | 12           | 27 | 42  | 12        | 29 | 41  | 12            | 28 | 44  | 13          | 12 | 12 | 12          | 12 | 12 |    |
| 149 | 158 | 1 | 8.3  | 37          | 44 | 52  | 50        | 50 | 58  | 53            | 55 | 62  | 44           | 43 | 52  | 48        | 53 | 58  | 54            | 55 | 62  | 46          | 46 | 51 | 44          | 49 | 51 |    |
| 150 | 157 | 2 | 4.5  | 57          | 60 | 64  | 61        | 61 | 62  | 65            | 64 | 63  | 64           | 62 | 64  | 60        | 63 | 64  | 65            | 65 | 66  | 63          | 61 | 63 | 63          | 62 | 62 |    |
| 150 | 158 | 1 | 7.2  | 48          | 53 | 57  | 58        | 56 | 59  | 61            | 61 | 61  | 56           | 52 | 56  | 55        | 60 | 60  | 63            | 62 | 63  | 57          | 54 | 58 | 55          | 57 | 59 |    |
| 150 | 160 | 2 | 6.9  | 45          | 55 | 59  | 55        | 61 | 63  | 58            | 65 | 65  | 52           | 54 | 60  | 54        | 63 | 65  | 59            | 65 | 67  | 53          | 52 | 55 | 51          | 54 | 55 |    |
| 162 | 173 | 1 | 11.1 | 33          | 38 | 49  | 36        | 39 | 45  | 36            | 41 | 42  | 37           | 38 | 48  | 34        | 39 | 45  | 35            | 40 | 46  | 37          | 35 | 36 | 37          | 36 | 35 |    |
| 177 | 185 | 2 | 11.4 | 10          | 12 | 14  | 11        | 13 | 14  | 11            | 13 | 14  | 10           | 13 | 14  | 10        | 13 | 15  | 10            | 13 | 15  | 10          | 11 | 11 | 10          | 10 | 10 |    |
| 186 | 202 | 3 | 14.1 | 10          | 12 | 15  | 10        | 12 | 14  | 10            | 12 | 14  | 10           | 12 | 14  | 10        | 12 | 14  | 10            | 12 | 14  | 11          | 10 | 10 | 11          | 10 | 10 |    |
| 187 | 202 | 2 | 13.7 | 11          | 14 | 16  | 12        | 14 | 16  | 11            | 14 | 16  | 12           | 14 | 16  | 12        | 14 | 16  | 11            | 14 | 15  | 12          | 12 | 11 | 12          | 12 | 11 |    |
| 223 | 237 | 3 | 10.7 | 4           | 6  | 12  | 5         | 6  | 11  | 6             | 6  | 11  | 5            | 6  | 12  | 5         | 6  | 12  | 6             | 6  | 12  | 6           | 5  | 5  | 6           | 5  | 5  |    |
| 223 | 261 | 4 | 15.9 | 5           | 7  | 11  | 6         | 7  | 10  | 5             | 7  | 11  | 5            | 8  | 11  | 6         | 8  | 11  | 6             | 7  | 11  | 5           | 5  | 5  | 6           | 5  | 5  |    |
| 238 | 261 | 4 | 16.0 | 9           | 14 | 18  | 10        | 14 | 18  | 10            | 14 | 18  | 10           | 14 | 18  | 10        | 14 | 19  | 11            | 14 | 18  | 10          | 10 | 10 | 10          | 10 | 10 |    |
| 241 | 261 | 2 | 12.7 | 11          | 16 | 21  | 12        | 17 | 22  | 13            | 17 | 21  | 12           | 16 | 21  | 12        | 17 | 22  | 13            | 17 | 22  | 12          | 12 | 13 | 13          | 13 | 12 |    |
| 244 | 261 | 4 | 10.6 | 9           | 15 | 21  | 10        | 15 | 20  | 11            | 16 | 20  | 10           | 14 | 20  | 10        | 15 | 20  | 12            | 15 | 21  | 11          | 10 | 11 | 10          | 11 | 10 |    |
| 262 | 272 | 1 | 15.3 | 1           | 1  | 5   | 1         | 1  | 5   | 1             | 2  | 5   | 1            | 1  | 5   | 1         | 1  | 5   | 1             | 1  | 5   | 1           | 1  | 1  | 1           | 1  | 1  |    |
| 273 | 286 | 1 | 11.6 | 37          | 45 | 54  | 44        | 47 | 57  | 44            | 47 | 56  | 40           | 45 | 55  | 43        | 49 | 58  | 46            | 49 | 57  | 40          | 42 | 42 | 41          | 43 | 43 |    |
| 287 | 293 | 1 | 13.6 | 0           | 0  | 0   | 0         | 0  | 0   | 0             | 0  | 0   | 0            | 0  | 0   | 0         | 0  | 0   | 0             | 0  | 0   | 0           | 0  | 0  | 0           | 0  | 0  |    |
| 294 | 326 | 3 | 10.0 | 62          | 67 | 69  | 69        | 68 | 71  | 71            | 71 | 73  | 67           | 66 | 70  | 68        | 70 | 72  | 73            | 72 | 74  | 69          | 67 | 70 | 68          | 69 | 69 |    |
| 294 | 328 | 3 | 10.9 | 61          | 66 | 70  | 68        | 67 | 70  | 69            | 69 | 71  | 66           | 65 | 69  | 66        | 69 | 71  | 72            | 71 | 71  | 67          | 66 | 68 | 67          | 68 | 68 |    |
| 329 | 355 | 3 | 14.4 | 14          | 28 | 44  | 13        | 20 | 35  | 13            | 28 | 32  | 13           | 24 | 37  | 12        | 20 | 36  | 13            | 20 | 34  | 13          | 12 | 12 | 14          | 13 | 12 |    |
| 333 | 341 | 2 | 14.6 | 21          | 38 | 51  | 19        | 23 | 42  | 19            | 22 | 41  | 20           | 35 | 51  | 18        | 26 | 46  | 20            | 23 | 41  | 21          | 18 | 18 | 22          | 19 | 18 |    |
| 334 | 341 | 2 | 11.7 | 23          | 38 | 53  | 22        | 25 | 43  | 22            | 26 | 42  | 23           | 35 | 53  | 21        | 29 | 47  | 24            | 26 | 44  | 24          | 21 | 21 | 25          | 22 | 22 |    |
| 334 | 355 | 2 | 13.1 | 15          | 29 | 46  | 14        | 20 | 36  | 14            | 20 | 36  | 13           | 25 | 39  | 13        | 22 | 38  | 13            | 19 | 37  | 14          | 14 | 13 | 16          | 14 | 13 |    |
| 342 | 349 | 2 | 6.0  | 7           | 20 | 40  | 5         | 15 | 31  | 4             | 16 | 31  | 5            | 17 | 32  | 4         | 17 | 32  | 5             | 16 | 33  | 6           | 5  | 5  | 7           | 5  | 4  |    |
| 346 | 355 | 1 | 8.6  | 11          | 14 | 22  | 11        | 14 | 19  | 12            | 16 | 18  | 10           | 14 | 18  | 11        | 16 | 19  | 11            | 15 | 20  | 10          | 11 | 10 | 12          | 11 | 11 |    |
| 356 | 371 | 2 | 8.7  | 14          | 20 | 22  | 13        | 16 | 18  | 13            | 16 | 18  | 15           | 20 | 22  | 15        | 17 | 21  | 14            | 16 | 20  | 16          | 14 | 13 | 16          | 13 | 13 |    |
| 356 | 372 | 4 | 11.3 | 12          | 17 | 20  | 11        | 14 | 16  | 10            | 13 | 16  | 13           | 17 | 19  | 13        | 15 | 19  | 11            | 13 | 17  | 13          | 12 | 11 | 13          | 11 | 11 |    |
| 371 | 380 | 2 | 5.1  | 14          | 20 | 26  | 9         | 11 | 16  | 9             | 12 | 14  | 7            | 10 | 18  | 8         | 11 | 15  | 10            | 12 | 15  | 8           | 8  | 9  | 9           | 9  | 9  |    |
| 372 | 380 | 1 | 4.7  | 14          | 21 | 27  | 9         | 11 | 16  | 10            | 13 | 14  | 6            | 9  | 12  | 7         | 12 | 13  | 9             | 13 | 11  | 8           | 8  | 8  | 8           | 9  | 9  |    |
| 373 | 380 | 1 | 4.3  | 18          | 22 | 25  | 10        | 11 | 14  | 10            | 12 | 13  | 7            | 11 | 16  | 8         | 12 | 13  | 10            | 13 | 13  | 8           | 9  | 9  | 9           | 10 | 10 |    |
| 381 | 398 | 3 | 13.0 | 16          | 21 | 26  | 12        | 17 | 24  | 11            | 17 | 23  | 17           | 21 | 26  | 13        | 19 | 26  | 12            | 17 | 24  | 17          | 12 | 11 | 17          | 13 | 11 |    |
| 401 | 413 | 3 | 11.1 | 16          | 20 | 23  | 6         | 11 | 18  | 6             | 10 | 18  | 9            | 20 | 24  | 6         | 15 | 23  | 6             | 11 | 19  | 11          | 6  | 5  | 10          | 6  | 5  |    |
| 402 | 413 | 3 | 10.6 | 16          | 20 | 22  | 6         | 10 | 16  | 5             | 10 | 16  | 10           | 21 | 22  | 6         | 15 | 21  | 5             | 10 | 17  | 11          | 6  | 5  | 10          | 6  | 6  |    |
| 414 | 420 | 1 | 9.0  | 62          | 69 | 75  | 3         | 15 | 54  | 2             | 12 | 49  | 42           | 69 | 74  | 12        | 47 | 73  | 4             | 18 | 55  | 48          | 6  | 3  | 45          | 5  | 2  |    |
| 421 | 434 | 2 | 11.2 | 20          | 31 | 34  | 20        | 30 | 35  | 19            | 30 | 31  | 19           | 27 | 30  | 19        | 31 | 32  | 19            | 30 | 32  | 22          | 21 | 21 | 22          | 21 | 20 |    |
| 444 | 456 | 2 | 8.7  | 1           | 6  | 22  | 1         | 5  | 20  | 1             | 9  | 27  | 1            | 4  | 17  | 1         | 5  | 18  | 1             | 9  | 27  | 0           | 1  | 2  | 1           | 1  | 1  |    |
| 457 | 466 | 3 | 7.4  | 0           | 1  | 5   | 0         | 1  | 3   | 0             | 1  | 5   | 0            | 1  | 4   | 0         | 1  | 3   | 0             | 1  | 6   | 0           | 0  | 0  | 0           | 0  | 1  |    |
| 467 | 476 | 2 | 7.2  | 0           | 4  | 19  | 1         | 3  | 17  | 1             | 5  | 22  | 1            | 3  | 18  | 0         | 3  | 17  | 1             | 5  | 23  | 1           | 1  | 0  | 1           | 0  | 1  |    |
| 470 | 476 | 1 | 4.8  | 1           | 5  | 27  | 1         | 4  | 22  | 1             | 7  | 28  | 0            | 5  | 23  | 0         | 4  | 22  | 1             | 6  | 30  | 1           | 1  | 1  | 1           | 0  | 1  |    |
| 480 | 486 | 2 | 5.5  | 0           | 1  | 2   | 0         | 0  | 1   | 0             | 0  | 3   | 0            | 0  | 2   | 0         | 0  | 1   | 0             | 0  | 3   | 0           | 0  | 0  | 0           | 0  | 0  |    |
| 487 | 495 | 2 | 0.0  | 0           | 0  | 1   | 1         | 1  | 1   | 0             | 0  | 1   | 0            | 0  | 0   | 0         | 0  | 0   | 0             | 0  | 0   | 0           | 1  | 0  | 1           | 1  | 0  |    |
| 508 | 537 | 4 | 10.9 | 4           | 13 | 25  | 5         | 13 | 24  | 5             | 13 | 22  | 5            | 14 | 25  | 5         | 14 | 25  | 5             | 13 | 23  | 5           | 5  | 4  | 5           | 5  | 4  |    |
| 532 | 537 | 2 | 4.8  | 1           | 2  | 14  | 0         | 1  | 13  | 0             | 2  | 12  | 1            | 1  | 13  | -1        | 2  | 12  | 0             | 1  | 12  | 1           | 0  | 1  | 0           | 0  | 0  |    |
| 538 | 555 | 3 | 9.0  | 0           | 3  | 18  | 0         | 2  | 15  | 0             | 3  | 18  | 1            | 3  | 17  | 0         | 2  | 15  | 0             | 3  | 19  | 1           | 1  | 1  | 0           | 1  | 0  |    |
| 538 | 556 | 4 | 10.5 | 0           | 3  | 18  | 0         | 2  | 15  | 0             | 3  | 19  | 0            | 2  | 17  | 0         | 2  | 15  | 0             | 3  | 20  | 0           | 0  | 0  | 0           | 0  | 0  |    |
| 556 | 570 | 5 | 9.7  | 1           | 3  | 16  |           |    |     |               |    |     |              |    |     |           |    |     |               |    |     |             |    |    |             |    |    |    |
